# Supplementary material for: Thickness-induced band-gap engineering in lead-free double perovskite Cs2AgBiBr6 for highly efficient photocatalysis
Source: Royal Society of Chemistry journal article supplement (doi:10.1039/d0cp03919e), 2021-01-01
Supplement: d0cp03919e1.pdf [file d0cp03919e1.pdf]

## Supporting Information:

### Thickness-induced band-gap engineering in lead-free double perovskite Cs<sub>2</sub>AgBiBr<sub>6</sub> for highly efficient photocatalysis

Bing-Hao Wang<sup>a#</sup>, Bin Gao<sup>a#</sup>, Jin-Rong Zhang<sup>a</sup>, Lang Chen<sup>a</sup>, Jun-kang Guo<sup>a</sup>, Sheng  
Shen<sup>a</sup>, Chak-Tong Au<sup>c</sup>, Kenli Li<sup>d</sup>, Biao Liu<sup>e</sup>, Shuang-Feng Yin<sup>a\*</sup>, Meng-Qiu Cai<sup>b\*</sup>

<sup>a</sup>*State Key Laboratory of Chemo/Biosensing and Chemometrics, College of Chemistry and  
Chemical Engineering, Hunan University, Changsha 410082, People's Republic of China*

<sup>b</sup>*School of Physics and electronics Science, Hunan University, Changsha 410082, People's  
Republic of China*

<sup>c</sup>*College of Chemistry and Chemical Engineering, Hunan Institute of Engineering, Xiangtan  
411104, Hunan, People's Republic of China*

<sup>d</sup>*School of Computer and communication, Hunan University, Changsha 410082, People's  
Republic of China*

<sup>e</sup>*Hunan Key Laboratory for Super-microstructure and Ultrafast Process, School of Physics and  
Electronics, Central South University, Changsha 410083, Hunan, China*

\* E-mail: sf\_yin@hnu.edu.cn (SF Yin), mqcai@hnu.edu.cn (MQCai).

**Figure S1**

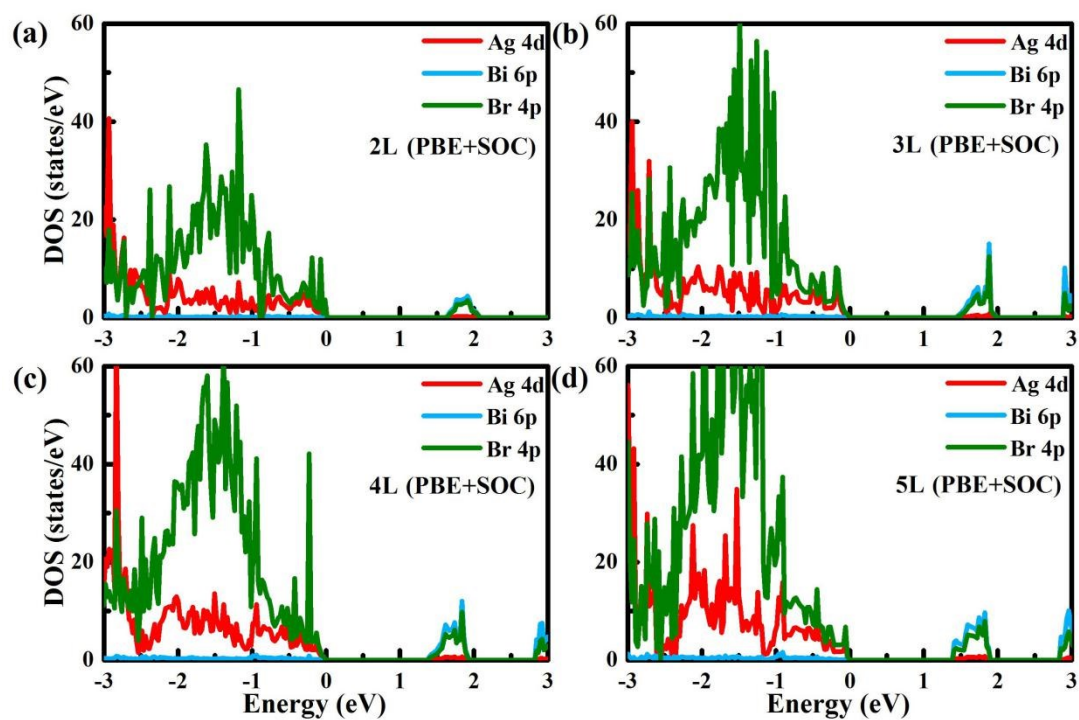

**Fig. S1** Calculated projected density of states (PDOS) of  $\text{Cs}_2\text{AgBiBr}_6$  with PBE+SOC functional for (a) two-layer, (b) three-layer, (c) four-layer and (d) five-layer configurations. The Fermi level is set at 0 eV.

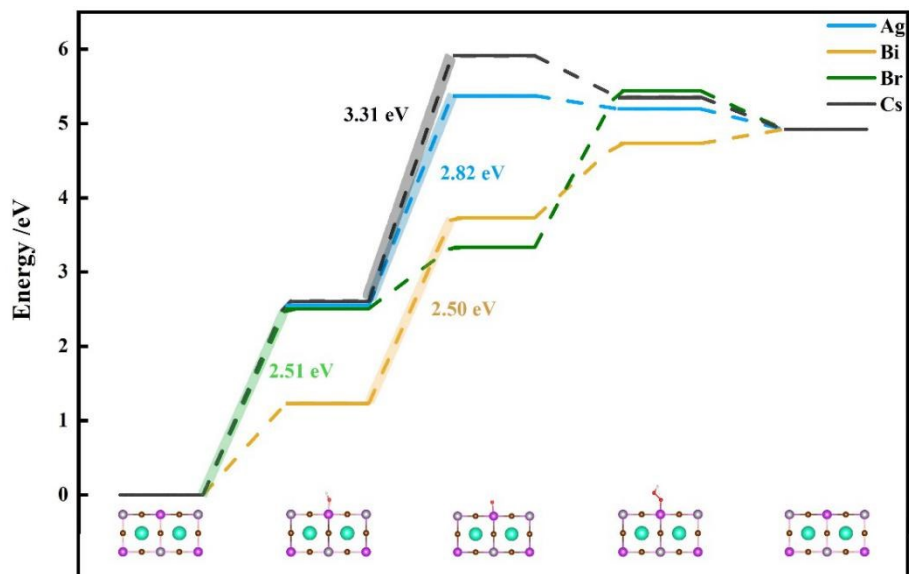

**Figure S2** Free energy diagram at 0V for OER of the different sites of single-layer  $\text{Cs}_2\text{AgBiBr}_6$ . The highlights indicate the rate-determining step with the values of the limiting energy barrier labelled.

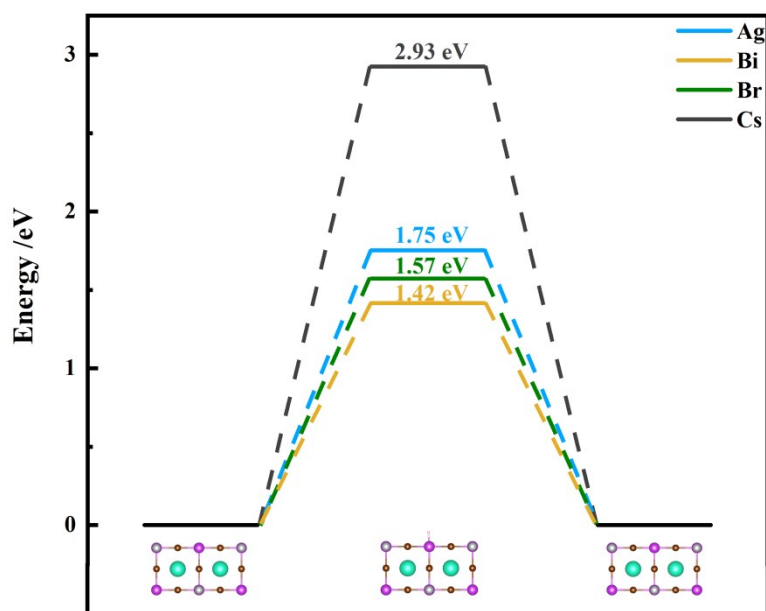

**Figure S3** Free energy diagram at 0V for HER of the different sites of single-layer  $\text{Cs}_2\text{AgBiBr}_6$ .

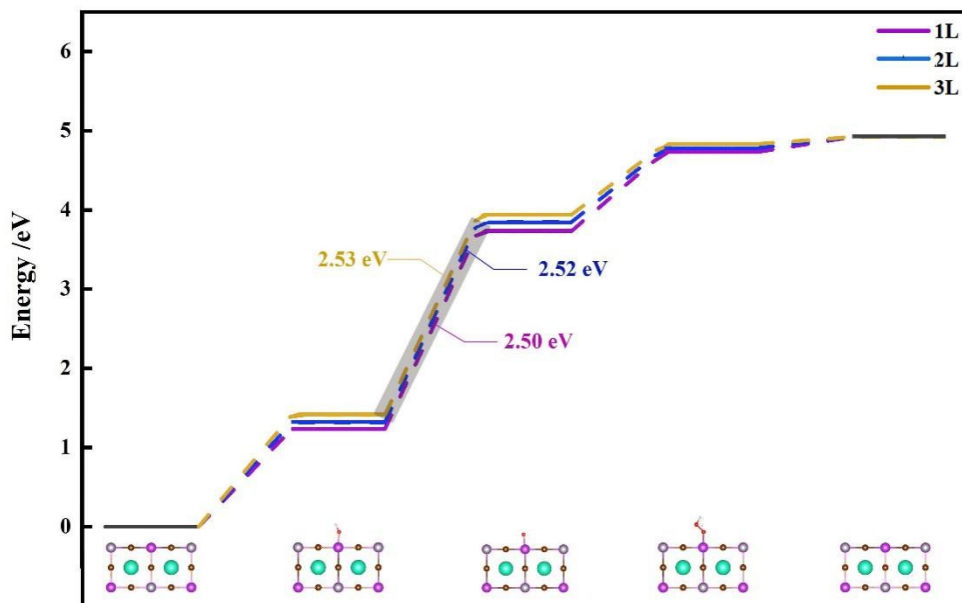

**Figure S4** Free energy diagram at 0 V for OER of the different layers of  $\text{Cs}_2\text{AgBiBr}_6$ . The highlights indicate the rate-determining step with the values of the limiting energy barrier labelled.

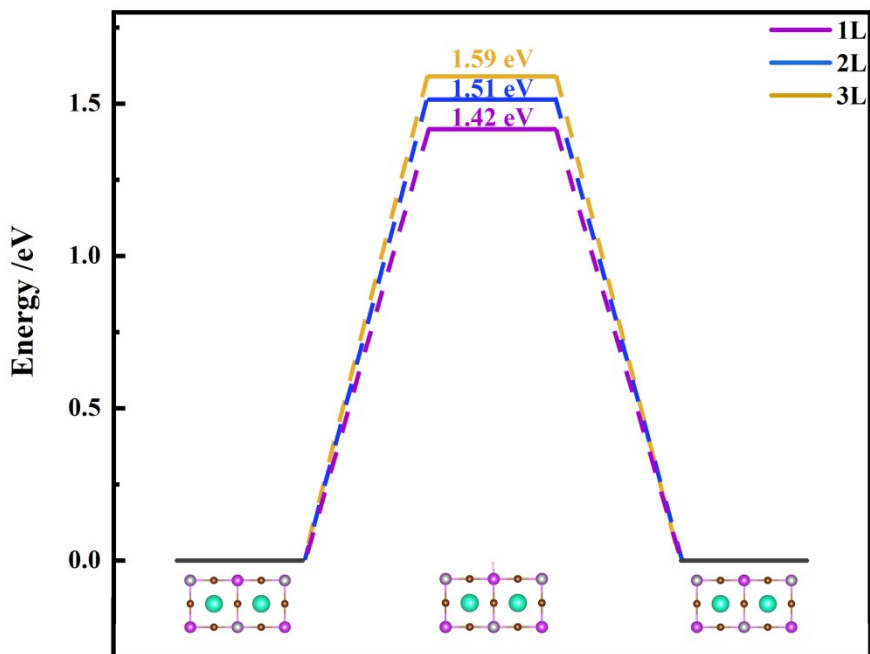

**Figure S5** Free energy diagram at 0 V for HER of the different layers of  $\text{Cs}_2\text{AgBiBr}_6$ .

**Table S1**

**Table S1** Calculated band gaps (eV) of the halide double perovskite  $\text{Cs}_2\text{AgBiBr}_6$  with different thicknesses by PBE, PBE+SOC and HSE+SOC functional.

| <b>Layer</b> | <b>PBE</b> | <b>PBE+SOC</b> | <b>HSE+SOC</b> |
|--------------|------------|----------------|----------------|
| 1L           | 2.02       | 1.53           | 2.39           |
| 2L           | 1.82       | 1.53           | 2.36           |
| 3L           | 1.56       | 1.31           | 2.11           |
| 4L           | 1.48       | 1.28           | 2.09           |
| 5L           | 1.44       | 1.22           | 2.04           |
